# Supplementary material for: Analysis of Draft Genome Sequence of Pseudomonas sp. QTF5 Reveals Its Benzoic Acid Degradation Ability and Heavy Metal Tolerance
Source: Biomed Res Int. 2017 Nov 15;2017:4565960. doi: 10.1155/2017/4565960 (PMC5705866; doi:10.1155/2017/4565960)
Supplement: Supplementary file 1 — Comparative analysis with 120 published genomes representing 31 species in the genus Pseudomonas. [file 4565960.f1.xlsx]

## Sheet: TableS1
Table S1 Comparative analysis with 120 published genomes representing 31 species in genus Pseudomonas
Organism	Strain	Assembly	Accession No./WGS	Tetra	ANIb	ANIm	AAI	DDH2	G+C difference
Pseudomonas lini	ZBG1	GCA_001238395.1	LFQO01	0.99731	93.3	94.01	94.96	54.1	0.02
Pseudomonas lini	DSM 16768	GCA_001042905.1	JYLB01	0.99731	93.26	93.98	95	53.9	0.11
Pseudomonas umsongensis	20MFCvi1.1	GCA_000377725.1	ARIW01	0.99475	90.7	91.39	92.74	43.4	0.74
Pseudomonas mandelii	36MFCvi1.1	GCA_000381285.1	ARLP01	0.99396	90.74	91.39	92.64	43.2	0.47
Pseudomonas moraviensis	R28-S	GCA_000512275.1	AYMZ01	0.96669	83.25	86.4	85.68	27.8	1.03
Pseudomonas chlororaphis	O6	GCA_000264555.1	CM001490.1/NZ_CM001490.1	0.92592	82.73	86.3	84.43	27.3	4.21
Pseudomonas chlororaphis	PA23	GCA_000698865.1	CP008696.1/NZ_CP008696.1	0.92578	82.69	86.29	84.41	27.3	3.93
Pseudomonas chlororaphis subsp. Aureofaciens	30-84	GCA_000281915.1	CM001559.1/NZ_CM001559.1	0.92607	82.81	86.27	84.73	27.5	4.24
Pseudomonas brassicacearum subsp. brassicacearum	NFM421	GCA_000194805.1	CP002585.1/NC_015379.1	0.95624	82.71	86.25	85.3	27.2	2.08
Pseudomonas kilonensis	1855-344	GCA_000968575.1	JZXC01	0.95696	82.65	86.25	85.33	27	1.99
Pseudomonas brassicacearum	DF41	GCA_000585995.1	CP007410.1/NZ_CP007410.1	0.96483	82.63	86.21	85.23	26.9	1.82
Pseudomonas mediterranea	CFBP 5447	GCA_000774145.1	AUPB01	0.95398	82.06	85.91	84.13	26.4	2.52
Pseudomonas veronii 1Yd	1YdBTEX2	GCA_000350565.1	AOUH01	0.94558	81.4	85.91	81.19	25.8	1.94
Pseudomonas frederiksbergensis	SI8	GCA_000802155.2	JQGJ02	0.95348	82.03	85.84	84.2	26.6	1.74
Pseudomonas batumici	UCM B-321	GCA_000820515.1	JXDG01	0.93906	80.96	85.79	79.69	25.7	3.08
Pseudomonas fluorescens	SBW25	GCA_000009225.1	AM181176.4/NC_012660.1	0.94341	80.82	85.77	81.22	25.3	1.79
Pseudomonas tolaasii P	PMS117	GCA_000276565.1	AJXG01	0.95077	80.78	85.76	80.35	25.1	1.54
Pseudomonas corrugata	CFBP 5454	GCA_000522485.1	ATKI01	0.96167	81.74	85.76	84.26	26	1.8
Pseudomonas protegens Pf-5	Pf-5	GCA_000012265.1	CP000076.1/NC_004129.6	0.91135	81.29	85.75	82.41	26	4.59
Pseudomonas extremaustralis	14-3 substr. 14-3b	GCA_000242115.2	AHIP01	0.94855	81.09	85.74	80.64	25.4	1.95
Pseudomonas gingeri	NCPPB 3146	GCA_000280765.1	AKBP01	0.91577	80.89	85.73	80.37	26	3.92
Pseudomonas simiae	WCS417	GCA_000698265.1	CP007637.1/NZ_CP007637.1	0.95058	80.8	85.68	81.39	25.3	1.61
Pseudomonas orientalis	DSM 17489	GCA_001439815.1	JYLM01	0.94313	80.79	85.65	80.74	25.3	1.8
Pseudomonas synxantha	BG33R	GCA_000263715.2	CM001514.1/NZ_CM001514.1	0.95464	80.61	85.63	80.52	25.2	0.94
Pseudomonas poae	RE*1-1-14	GCA_000336465.1	CP004045.1/NC_020209.1	0.94457	80.86	85.62	80.66	25.3	2.14
Pseudomonas trivialis	IHBB745	GCA_001186335.1	CP011507.1/NZ_CP011507.1	0.94858	80.62	85.61	81.35	25.2	1.19
Pseudomonas libanensis	RIT-PI-g	GCA_001297075.1	LHOY01	0.94794	80.67	85.58	81.37	25.2	1.31
Pseudomonas rhodesiae	FF9	GCA_000821225.1	CCYI01	0.93666	80.54	85.47	81.18	25	1.66
Pseudomonas fuscovaginae	UPB0736	GCA_000251185.1	AIEU01	0.94549	80.04	85.24	79.99	24.7	2.75
Pseudomonas agarici	NCPPB 2472	GCA_001543125.1	CP014135.1/NZ_CP014135.1	0.94853	79.9	85.06	79.49	24.6	0.27
Pseudomonas fragi	P121	GCA_001543265.1	CP013861.1/NZ_CP013861.1	0.92465	78.97	85	79.1	24	0.08
Pseudomonas taetrolens	DSM 21104	GCA_001042915.1	JYLA01	0.92674	78.65	84.94	79.66	23.9	0.45
Pseudomonas lundensis	DSM 6252	GCA_001042985.1	JYKY01	0.93041	78.45	84.9	78.86	23.4	0.17
Pseudomonas helleri	DSM 29165	GCA_001043025.1	JYLD01	0.93219	78.69	84.85	78.49	23.7	0.61
Pseudomonas alkylphenolia	KL28	GCA_000746525.1	CP009048.1/NZ_CP009048.1	0.95291	78.3	84.81	77.34	23.1	1.92
Pseudomonas viridiflava	UASWS0038	GCA_000307715.1	AMQP01	0.93415	77.29	84.77	75.73	22.7	0.65
Pseudomonas marginalis	ICMP 11289	GCA_001467325.1	LKGX01	0.93539	77.42	84.7	75.72	22.7	0.48
Pseudomonas savastanoi pv. Glycinea	race 4	GCA_000187065.2	AEGH01	0.92446	77.28	84.68	75.73	22.5	0.75
Pseudomonas weihenstephanensis	DSM 29166	GCA_001043055.1	JYLF01	0.90818	78.22	84.68	79.09	23.4	1.4
Pseudomonas avellanae	BPIC 631	GCA_000302915.1	AKBS01	0.94079	77.41	84.67	75.21	23.3	0
Pseudomonas psychrophila	HA-4	GCA_000282975.1	ALJC01	0.88495	77.87	84.67	78.49	23.3	2.31
Pseudomonas lutea	DSM 17257	GCA_000759445.1	JRMB01	0.96284	76.82	84.65	75.86	22.4	1.44
Pseudomonas cichorii	JBC1	GCA_000517305.1	CP007039.1/NZ_CP007039.1	0.91619	77.72	84.63	75.69	22.8	0.61
Pseudomonas cannabina	ICMP2823	GCA_001400175.1	LJPX01	0.94451	77.52	84.63	74.74	22.8	0
Pseudomonas amygdali pv. ciccaronei	ICMP5710	GCA_001400755.1	LJPY01	0.92331	77.18	84.63	74.81	22.5	0.53
Pseudomonas abietaniphila	KF701	GCA_000974525.1	BBQJ01	0.97814	77.39	84.63	-	23	0.65
Pseudomonas abietaniphila	KF717	GCA_000876035.1	BBQR01	0.97804	77.37	84.63	-	23	0.66
Pseudomonas savastanoi pv. retacarpa	ICMP16945	GCA_001400935.1	LJRD01	0.92468	77.19	84.62	74.78	22.6	0.58
Pseudomonas savastanoi pv. savastanoi	NCPPB 3335	GCA_000164015.2	ADMI02	0.92697	77.26	84.62	75.29	22.6	0.61
Pseudomonas ficuserectae	ICMP7848	GCA_001400815.1	LJQJ01	0.92777	77.17	84.61	74.88	22.5	0.82
Pseudomonas rhizosphaerae	DSM 16299	GCA_000761155.1	CP009533.1/NZ_CP009533.1	0.90192	77.39	84.6	74.96	22.9	3.28
Pseudomonas amygdali pv. photiniae	ICMP7840	GCA_001400415.1	LJQO01	0.92565	77.11	84.6	74.55	22.6	0.52
Pseudomonas savastanoi	4352	GCA_001293725.1	LGKR01	0.92506	77.17	84.6	75.15	22.5	0.72
Pseudomonas savastanoi pv. nerii	ICMP16943	GCA_001400575.1	LJQW01	0.9233	77.24	84.6	75.2	22.6	0.45
Pseudomonas amygdali pv. myricae	CFBP 2897	GCA_001535805.1	LIHY01	0.9235	77.13	84.6	75.63	22.5	0.52
Pseudomonas vranovensis	DSM 16006	GCA_000425805.1	AUED01	0.93503	77.97	84.6	76.93	22.8	2.82
Pseudomonas savastanoi pv. fraxini	ICMP7711	GCA_001483545.1	LLJL01	0.92601	77.19	84.59	74.72	22.5	0.69
Pseudomonas japonica	NBRC 103040	GCA_000730585.1	BBIR01	0.89799	77.81	84.58	74.79	22.9	5.44
Pseudomonas syringae pv. syringae	B728a	GCA_000012245.1	CP000075.1/NC_007005.1	0.94777	77.56	84.57	75.29	22.7	0.52
Pseudomonas amygdali pv. myricae	AZ84488	GCA_001293985.1	LGLA01	0.92558	77.13	84.57	75.32	22.4	0.48
Pseudomonas amygdali pv. eriobotryae	CFBP 2343	GCA_001538055.1	LIID01	0.93018	77.13	84.56	75.07	22.5	0.88
Pseudomonas amygdali pv. ulmi	CFBP 1407	GCA_001535915.1	LIHQ01	0.92815	77.16	84.55	75.09	22.6	0.79
Pseudomonas syringae pv. lapsa	ATCC 10859	GCA_001482725.1	CP013183.1/NZ_CP013183.1	0.9454	77.42	84.54	75.19	22.8	0.42
Pseudomonas amygdali pv. hibisci	ICMP9623	GCA_001400395.1	LJQN01	0.92175	77.15	84.54	74.8	22.4	0.29
Pseudomonas amygdali pv. mori	ICMP4331	GCA_001400525.1	LJQU01	0.92599	77.12	84.54	74.83	22.6	0.83
Pseudomonas amygdali pv. Morsprunorum	M302280	GCA_000145745.1	AEAE01	0.94289	77.45	84.54	74.89	23.1	0.08
Pseudomonas amygdali pv. Aesculi	2250	GCA_000163275.1	ACXT01	0.92415	77.21	84.54	75.38	22.6	0.37
Pseudomonas amygdali pv. Tabaci	6605	GCA_000275945.1	AJXI01	0.92773	77.25	84.53	74.94	22.4	0.71
Pseudomonas meliae	CFBP 3225	GCA_000935675.1	JYHE01	0.91974	77.35	84.53	75.93	22.4	0.31
Pseudomonas savastanoi pv. Phaseolicola	1644R	GCA_000225805.1	AGAS01	0.92533	77.2	84.52	75.08	22.6	0.76
Pseudomonas amygdali pv. lachrymans	M302278	GCA_000145885.1	AEAM01	0.94158	77.37	84.51	75.16	22.9	0.12
Pseudomonas amygdali pv. Dendropanacis	CFBP 3226	GCA_000935735.1	JYHG01	0.92699	77.17	84.51	75.63	22.6	0.6
Pseudomonas caricapapayae	ICMP2855	GCA_001400735.1	LJPW01	0.9161	76.96	84.49	74.76	22.6	0.39
Pseudomonas amygdali pv. mellea	N6801	GCA_001293975.1	LGLB01	0.92748	77.27	84.49	74.98	22.5	0.83
Pseudomonas amygdali pv. sesami	HC_1	GCA_001294115.1	LGKS01	0.92713	77.28	84.48	75.48	22.5	0.51
Pseudomonas coronafaciens pv. Oryzae	1_6	GCA_000156995.1	ABZR01	0.92855	76.94	84.46	74.79	23	0.82
Pseudomonas endophytica	BSTT44	GCA_001411475.1	LLWH01	0.79198	77.06	84.46	78.23	22.8	3.55
Pseudomonas coronafaciens pv. atropurpurea	ICMP4457	GCA_001400695.1	LJPS01	0.92753	76.84	84.4	74.9	22.6	0.96
Pseudomonas tremae	ICMP9151	GCA_001401155.1	LJRO01	0.92636	76.81	84.39	74.96	22.7	0.91
Pseudomonas coronafaciens pv. garcae	ICMP4323	GCA_001400345.1	LJQK01	0.92485	76.93	84.39	75.35	22.6	0.83
Pseudomonas coronafaciens pv. porri	LMG 28495	GCA_001275725.1	JTHM01	0.9305	76.83	84.36	74.91	22.6	1.19
Pseudomonas coronafaciens pv. zizaniae	ICMP8921	GCA_001401235.1	LJRT01	0.92762	76.87	84.34	74.94	22.6	0.92
Pseudomonas congelans	ICMP19117	GCA_001400775.1	LJQB01	0.93956	77.31	84.34	75.07	22.5	0.67
Pseudomonas monteilii	SB3101	GCA_000510325.1	CP006979.1/NC_023076.1	0.90599	77.02	84.27	73.97	22.3	3.78
Pseudomonas plecoglossicida	NyZ12	GCA_000831585.1	CP010359.1/NZ_CP010359.1	0.9077	77.04	84.2	73.71	22.3	3.69
Pseudomonas taiwanensis	DSM 21245	GCA_000425785.1	AUEC01	0.92674	76.53	84.15	74.73	22	3.16
Pseudomonas entomophila	L48	GCA_000026105.1	CT573326.1/NC_008027.1	0.89769	76.96	84.13	74.19	22.2	5.45
Pseudomonas putida	F1	GCA_000016865.1	CP000712.1/NC_009512.1	0.92403	76.4	84.05	73.57	22	3.15
Pseudomonas mosselii	SJ10	GCA_000498975.2	CP009365.1/NZ_CP009365.1	0.89597	76.75	84.05	74.18	22	4.68
Pseudomonas parafulva	CRS01-1	GCA_000800255.1	CP009747.1/NZ_CP009747.1	0.90249	76.42	84	74.15	21.8	4.75
Pseudomonas cremoricolorata	ND07	GCA_000759535.1	CP009455.1/NZ_CP009455.1	0.91062	76.3	83.97	72.83	21.6	4.53
Pseudomonas taeanensis	MS-3	GCA_000498575.2	AWSQ01	0.92769	75.52	83.92	71.61	21.4	2.21
Pseudomonas fulva	12-X	GCA_000213805.1	CP002727.1/NC_015556.1	0.89633	75.23	83.87	69.33	21.3	4.8
Pseudomonas resinovorans	NBRC 106553	GCA_000412695.1	-	0.85942	75.76	83.76	70.43	21.3	6.56
Pseudomonas pseudoalcaligenes		GCA_000953455.1	LK391695.1/NZ_LK391695.1	0.91539	75.42	83.68	70.46	21.3	3.63
Pseudomonas pseudoalcaligenes	CECT5344	GCA_000297075.2	HG916826.1/NZ_HG916826.1	0.91493	75.42	83.62	70.43	21.4	3.63
Pseudomonas toyotomiensis	KF710	GCA_000974625.1	BBQO01	0.91282	74.95	83.62	69.18	21.1	3.92
Pseudomonas citronellolis	TTU2014-011ASC	GCA_001446995.1	LKKN01	0.81161	74.94	83.6	68.99	20.8	8.72
Pseudomonas chloritidismutans	AW-1	GCA_000495915.1	AOFQ01	0.91064	74	83.56	67.8	20.6	3.78
Pseudomonas stutzeri	A1501	GCA_000013785.1	CP000304.1/NC_009434.1	0.88916	74.2	83.55	68.7	20.8	5.17
Pseudomonas denitrificans	ATCC 13867	GCA_000349845.1	CP004143.1/NC_020829.1	0.87671	74.83	83.55	69.19	20.7	6.53
Pseudomonas alcaligenes	NBRC 14159	GCA_000467105.1	BATI01	0.82952	75.23	83.55	69.76	20.9	6.06
Pseudomonas mendocina	ymp	GCA_000016565.1	CP000680.1/NC_009439.1	0.86739	75.3	83.51	69.72	21.2	5.97
Pseudomonas nitroreducens	TX1	GCA_000313755.1	AMZB01	0.88079	74.48	83.51	68.66	20.3	5.78
Pseudomonas alcaliphila	34	GCA_000319815.1	ANGB01	0.91123	74.99	83.51	69.73	21.1	3.93
Pseudomonas xanthomarina	S11	GCA_000825645.1	CCYE01	0.90718	73.99	83.5	67.76	20.6	3.64
Pseudomonas knackmussii	B13	GCA_000689415.1	HG322950.1/NZ_HG322950.1	0.85913	74.79	83.46	69.08	20.8	6.9
Pseudomonas pelagia	CL-AP6	GCA_000410875.1	AROI01	0.88986	69.43	83.43	59.08	20.4	1.31
Pseudomonas luteola	XLDN4-9	GCA_000282775.1	ALAT01	0.77285	70.33	83.36	64.8	18.6	4.49
Pseudomonas otitidis	LNU-E-001	GCA_000632755.1	JGYF01	0.87424	74.6	83.36	69.28	20.3	7.73
Pseudomonas aeruginosa	PAO1	GCA_000006765.1	AE004091.2/NC_002516.2	0.87371	74.64	83.34	69.49	20.5	7.84
Pseudomonas tuomuerensis	JCM 14085	GCA_000806415.1	JTAK01	0.8701	73.85	83.28	67.42	20.4	7.12
Pseudomonas thermotolerans	DSM 14292	GCA_000364625.1	AQPA01	0.81087	75.16	83.26	71.03	20.7	8.13
Pseudomonas azotifigens	DSM 17556	GCA_000425625.1	AUDU01	0.83077	74.11	83.23	67.06	20.4	8.29
Pseudomonas bauzanensis	W13Z2	GCA_000632535.1	JFHS01	0.85771	69.78	83.21	56.53	19.3	3.05
Pseudomonas balearica	DSM6083 (=SP1402)	GCA_000818015.1	CP007511.1/NZ_CP007511.1	0.87047	73.66	83.13	67.63	20.4	5.94
Pseudomonas oryzihabitans	USDA-ARS-USMARC-56511	GCA_001518815.1	CP013987.1/NZ_CP013987.1	0.85395	72.4	83.12	65.13	19.9	6.4
Pseudomonas psychrotolerans	L19	GCA_000236825.2	AHBD01	0.83665	72.76	83.08	64.8	20.1	6.97
Pseudomonas oleovorans	MOIL14HWK12	GCA_000510765.1	AZOB01	0.83202	72.7	83.07	64.9	19.8	7.56
Pseudomonas caeni	DSM 24390	GCA_000421765.1	ATXQ01	0.54689	68.15	83	62.75	18.1	10.45
